# Supplementary material
Source: bioRxiv or medRxiv preprint supplement (https://medrxiv.org/highwire/filestream/69179/field_highwire_adjunct_files/1/19007286-2.pdf)
Supplement: Supplementary file [file 19007286-2.pdf]

**Supplementary Table 2.** Numeric results from Figure 4: Comparison of medication extraction NLP systems for entity-level precision, recall, and F1 performance measures on test sets.

|            |             | Test Set Performance |                   |                 |                   |                   |                 |                   |                   |                 |
|------------|-------------|----------------------|-------------------|-----------------|-------------------|-------------------|-----------------|-------------------|-------------------|-----------------|
|            |             | Tacrolimus           |                   |                 | Lamotrigine       |                   |                 | Allopurinol       |                   |                 |
|            |             | Precision            | Recall            | F1              | Precision         | Recall            | F1              | Precision         | Recall            | F1              |
| DrugName   | medExtractR | .96 [.92, 1.00]      | 1.00 [1.00, 1.00] | .98 [.96, 1.00] | 1.00 [1.00, 1.00] | .97 [.94, 1.00]   | .99 [.97, 1.00] | .98 [.94, 1.00]   | .99 [.97, 1.00]   | .98 [.96, 1.00] |
|            | MedXN       | 1.00 [1.00, 1.00]    | .96 [.92, 1.00]   | .98 [.96, 1.00] | .82 [.69, .93]    | .79 [.64, .92]    | .81 [.67, .92]  | 1.00 [1.00, 1.00] | .98 [.94, 1.00]   | .99 [.97, 1.00] |
|            | MedEx       | .91 [.85, .97]       | .99 [.96, 1.00]   | .95 [.91, .98]  | .99 [.95, 1.00]   | .95 [.85, 1.00]   | .97 [.91, 1.00] | .98 [.95, 1.00]   | .97 [.92, 1.00]   | .98 [.94, 1.00] |
|            | CLAMP       | .97 [.93, 1.00]      | .95 [.90, .99]    | .96 [.93, .99]  | 1.00 [1.00, 1.00] | .94 [.84, 1.00]   | .97 [.91, 1.00] | .98 [.95, 1.00]   | .85 [.79, .91]    | .91 [.87, .95]  |
| Strength   | medExtractR | .97 [.93, 1.00]      | 1.00 [1.00, 1.00] | .99 [.96, 1.00] | .97 [.92, 1.00]   | .96 [.90, 1.00]   | .97 [.93, 1.00] | .99 [.97, 1.00]   | .97 [.93, 1.00]   | .98 [.96, 1.00] |
|            | MedXN       | .94 [.89, .99]       | .97 [.92, 1.00]   | .96 [.92, .98]  | .99 [.96, 1.00]   | .87 [.74, .99]    | .93 [.85, .99]  | .96 [.90, 1.00]   | .96 [.90, 1.00]   | .96 [.91, 1.00] |
|            | MedEx       | .82 [.73, .91]       | .98 [.95, 1.00]   | .90 [.84, .95]  | .93 [.86, .99]    | .85 [.72, .97]    | .89 [.80, .96]  | .93 [.87, .99]    | .91 [.77, 1.00]   | .92 [.84, .98]  |
|            | CLAMP       | .89 [.80, .97]       | .82 [.72, .90]    | .85 [.77, .92]  | .98 [.93, 1.00]   | .61 [.46, .78]    | .75 [.63, .87]  | .97 [.91, 1.00]   | .80 [.72, .88]    | .87 [.82, .93]  |
| DoseAmount | medExtractR | .97 [.92, 1.00]      | 1.00 [1.00, 1.00] | .99 [.96, 1.00] | .93 [.84, 1.00]   | 1.00 [1.00, 1.00] | .96 [.91, 1.00] | .93 [.85, .99]    | 1.00 [1.00, 1.00] | .96 [.92, .99]  |
|            | MedXN       | .93 [.85, 1.00]      | .97 [.91, 1.00]   | .95 [.90, .99]  | .97 [.91, 1.00]   | .93 [.83, 1.00]   | .95 [.89, 1.00] | .97 [.93, 1.00]   | .97 [.93, 1.00]   | .97 [.95, .99]  |
|            | MedEx       | .93 [.80, 1.00]      | .34 [.19, .51]    | .50 [.31, .66]  | .97 [.91, 1.00]   | .90 [.80, 1.00]   | .94 [.86, 1.00] | .99 [.96, 1.00]   | .99 [.96, 1.00]   | .99 [.97, 1.00] |
|            | CLAMP       | .70 [.38, 1.00]      | .18 [.07, .32]    | .29 [.12, .46]  | .93 [.81, 1.00]   | .68 [.51, .86]    | .78 [.65, .90]  | 1.00 [1.00, 1.00] | .87 [.79, .94]    | .93 [.89, .97]  |
| Frequency  | medExtractR | .98 [.96, 1.00]      | .98 [.95, 1.00]   | .98 [.96, 1.00] | .96 [.91, 1.00]   | .91 [.83, .98]    | .93 [.89, .97]  | .94 [.88, .98]    | .97 [.93, 1.00]   | .96 [.92, .99]  |
|            | MedXN       | .94 [.88, .98]       | .92 [.85, .98]    | .93 [.88, .97]  | .95 [.89, 1.00]   | .77 [.62, .90]    | .85 [.74, .93]  | .94 [.87, .99]    | .96 [.90, 1.00]   | .95 [.91, .99]  |
|            | MedEx       | .51 [.40, .63]       | .53 [.41, .64]    | .52 [.41, .64]  | .79 [.66, .90]    | .63 [.48, .76]    | .70 [.58, .80]  | .83 [.75, .92]    | .86 [.78, .94]    | .85 [.78, .92]  |
|            | CLAMP       | .60 [.46, .74]       | .41 [.30, .52]    | .49 [.37, .60]  | .79 [.64, .90]    | .42 [.31, .54]    | .55 [.42, .66]  | .90 [.82, .96]    | .71 [.61, .81]    | .79 [.72, .87]  |

F1 represents F-measure. The test sets consisted of 50 notes each for tacrolimus and lamotrigine, and 110 notes for allopurinol. The drug entities presented here reflect a restricted list of entities which have been standardized across all four natural language processing (NLP) systems to ensure comparability. MedExtractR was developed on clinical notes for tacrolimus and lamotrigine, with no training notes for allopurinol.
